# Supplementary material for: Target‐Adverse Event Profiles to Augment Pharmacovigilance: A Pilot Study With Six New Molecular Entities
Source: PubMed Central journal article supplement — CPT Pharmacometrics Syst Pharmacol. 2018 Oct 24;7(12):809–17. doi: 10.1002/psp4.12356 (PMC6310867; doi:10.1002/psp4.12356), 2018-10-24

# Reporting frequency in FAERS by MedDRA PT and DME

## 1000 Most Frequent MedDRA PTs in FAERS

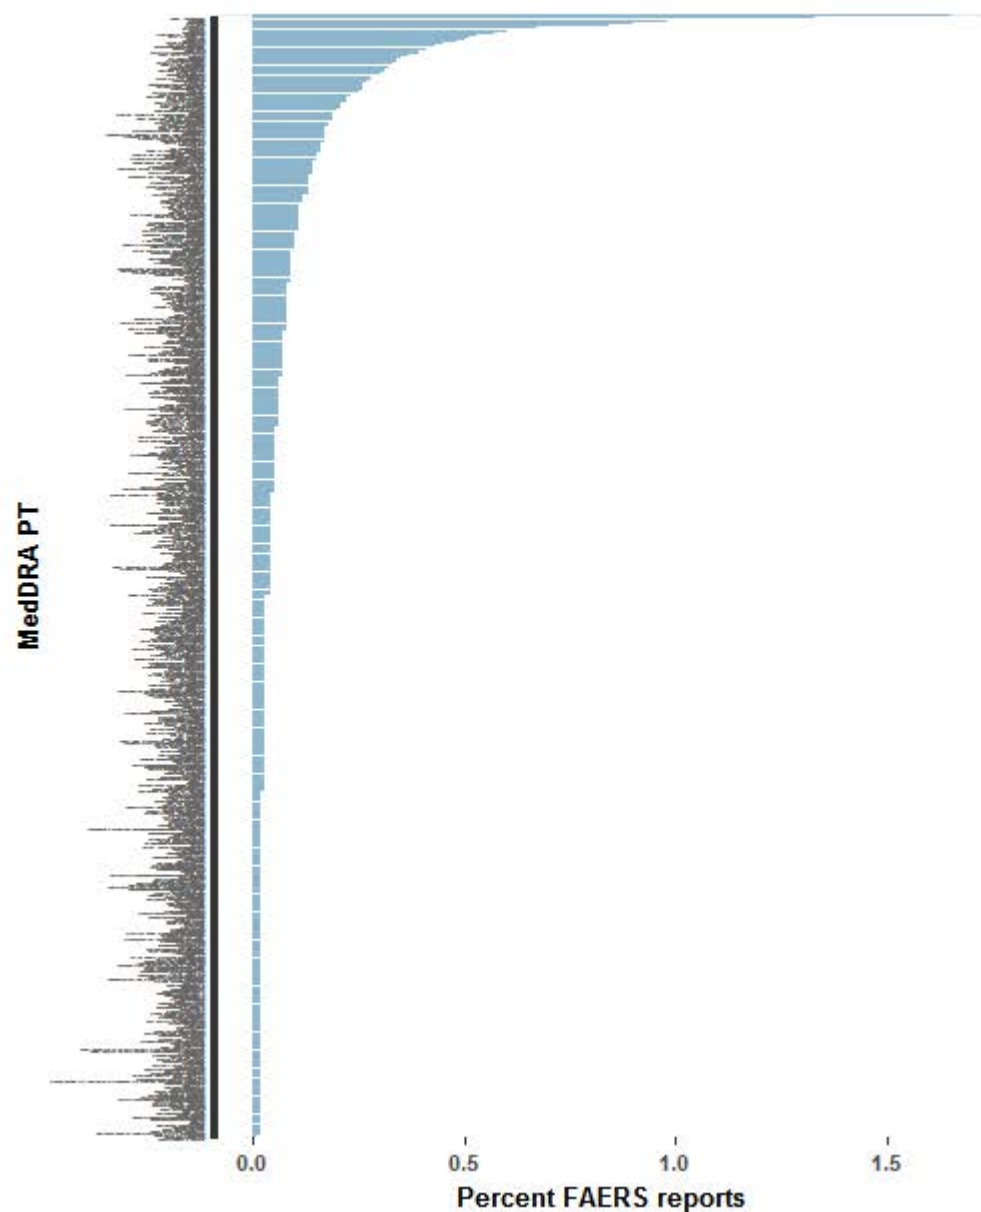

## All DMEs in FAERS

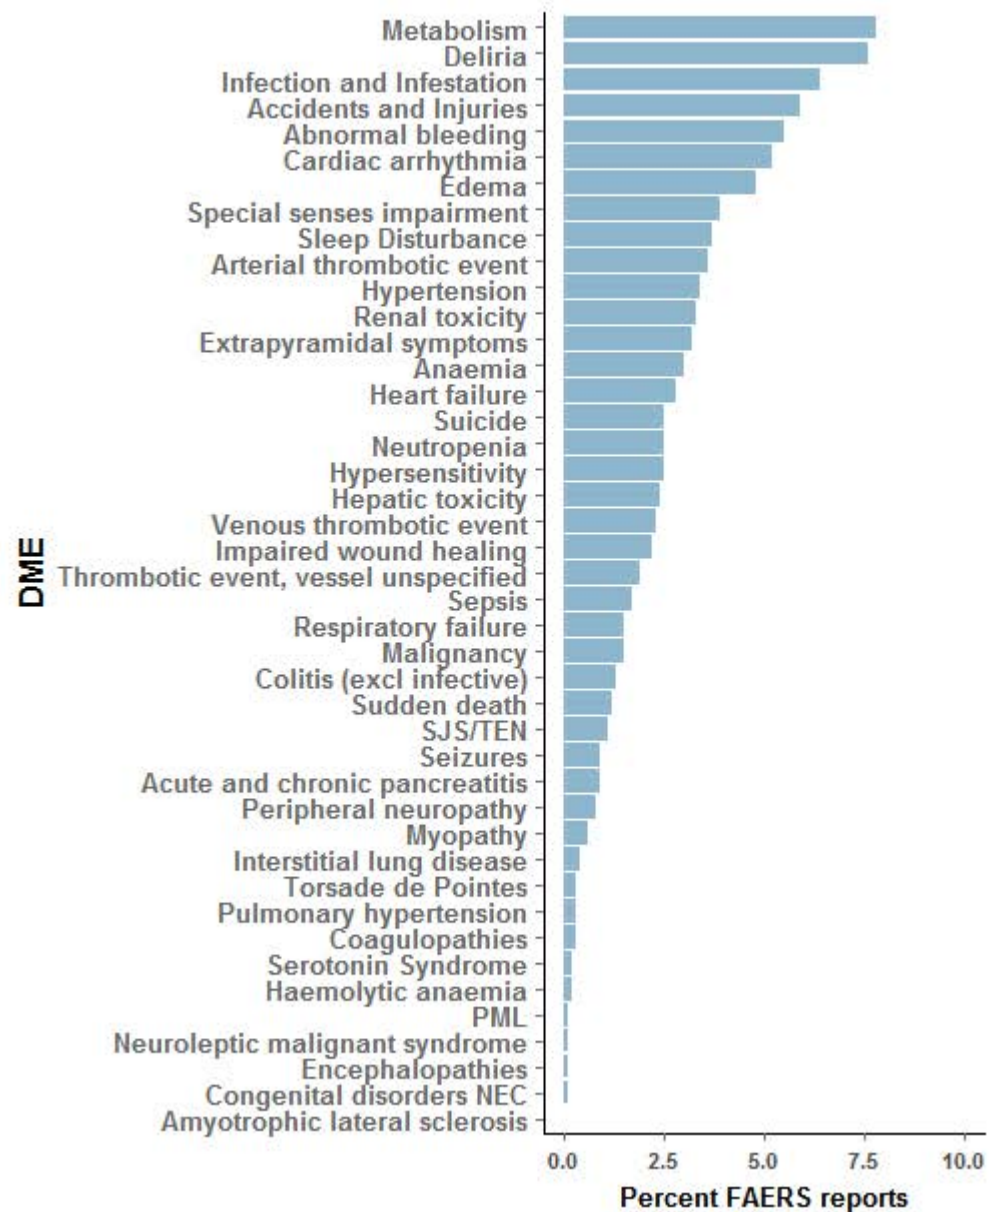

Supplement: PSP4-7-809-s003.pdf [file PSP4-7-809-s003.pdf]
